# Supplementary material for: Transcriptional heterogeneity in the lactase gene within cell-type is linked to the epigenome
Source: PubMed Central journal article supplement (PMC5282553; doi:10.1038/srep41843), 2017-01-31
Supplement: srep41843-s1.pdf [file srep41843-s1.pdf]

1 **Transcriptional heterogeneity in the lactase gene within cell-type is linked to the**  
2 **epigenome**

3

4 Edward Oh<sup>1,4</sup>, Richie Jeremian<sup>1,4</sup>, Gabriel Oh<sup>1</sup>, Daniel Groot<sup>1</sup>, Miki Susic<sup>1</sup>, KwangHo Lee<sup>2</sup>, Kelly  
5 Foy<sup>2</sup>, Peter W. Laird<sup>2</sup>, Arturas Petronis<sup>1,5,\*</sup>, Viviane Labrie<sup>1,3,5,\*</sup>.

6

7 <sup>1</sup>Krembil Family Epigenetics Laboratory, Centre for Addiction and Mental Health, Toronto,  
8 Ontario, Canada

9 <sup>2</sup>Center for Epigenetics, Van Andel Research Institute, Grand Rapids, MI, USA

10 <sup>3</sup>Center for Neurodegenerative Science, Van Andel Research Institute, Grand Rapids, MI, USA

11 <sup>4</sup>equal contribution (first authors)

12 <sup>5</sup>equal contribution (senior authors)

13

14 \*Correspondence: Art.Petronis@camh.ca (A.P.) and Viviane.Labrie@vai.org (V.L.)

15

16 **Keywords:** Epigenetics; DNA methylation; DNA modification; Lactase gene; mRNA; Small  
17 intestine; Enhancers; Aging; Cell heterogeneity

18

19 **SUPPLEMENTARY MATERIAL**

20

21 Supplementary File 1 (Oh\_Supp\_File\_1\_PadlockProbes.xlsx)

22

23 *Supplementary PDF list of content:*

24 Detailed Supplementary Material and Methods

25 Supplementary References

26 Supplementary Table 1

27 Supplementary Table 2

28 Supplementary Figure 1

## 29 Detailed Supplementary Material and Methods

30

### 31 *Mouse intestinal samples and milk treatments*

32

33 All animal procedures were approved by the Institutional Animal Care Committee of the  
34 Toronto Centre for Phenogenomics (TCP) and compiled per the requirements of the Canadian  
35 Council on Animal Care and Province of Ontario Animals for Research Act. C57BL/6NCrl mice  
36 were bred at the TCP. Mice were housed in ventilated polycarbonate cages, and given *ad libitum*  
37 sterile food (Harlan 2918X) and water, unless stated otherwise. Adult mice were housed by sex  
38 in groups of 2-5 littermates. The vivarium was maintained under temperature ( $21^{\circ}\text{C}\pm 1^{\circ}\text{C}$ ) and  
39 humidity (50-60%), with a 12-hour diurnal cycle (lights on 0700-1900).

40

41 Infant mice at postnatal day 6 (P6) and adult mice at postnatal day 60 (P60) were used to  
42 investigate the segmental gradient and age-associated epigenetic changes. The small intestine  
43 was harvested and dissected into nine equal parts; the duodenum (segment 1-2), jejunum  
44 (segment 3-5) and ileum (segment 6-9). Each of these anatomical segments was further  
45 dissected into three equal parts resulting in nine dissections of the small intestine (segments 1-  
46 9). To investigate the diet/environmental associated epigenetic changes, postnatal day 30 mice  
47 were supplied *ad libitum* sterile food with either 2% lactose-containing organic milk (Grand Pré)  
48 or 2% lactose-free milk (Natrell) in the place of water for 60 days. Approximately 500 ml of lactose-  
49 containing milk (LAC+) was supplemented with 1 tablespoon (or ~12 g) of sucrose (Redpath) to  
50 promote a consumption level comparable to that of mice fed lactose-free milk every 1.5~2 days.  
51 No sex differences were observed in either DNA modification or *Lct* mRNA expression level.  
52 Mouse intestinal samples were processed by researchers who were blind to genotype and  
53 experimental conditions.

54

55 *Enterocyte isolation and DNA extraction*

56

57 Enterocytes were isolated specifically from the villi of each small intestine segment  
58 (approx. 100 mg) using a previously validated method<sup>1,2</sup>. The segments were washed four times  
59 in 1 mL citrate buffer (27 mM Na-citrate, 5.6 mM Na<sub>2</sub>HPO<sub>4</sub>, 96 mM NaCl, 8 mM KH<sub>2</sub>PO<sub>4</sub>, 1.5 mM  
60 KCl, pH 7.4) containing 10 µl of DNase inactivation reagent (Life Technologies) with gentle  
61 agitation. Enterocytes were released with the addition of 1 mL Ca<sup>2+</sup>-chelating buffer (1.5 mM  
62 EDTA, 0.5 mM DTT, 10 mM NaH<sub>2</sub>PO<sub>4</sub>, 154 mM NaCl) at 37°C for 15 min with agitation (700 rpm).  
63 The intestinal segments and suspended enterocytes were separated, and the enterocytes were  
64 collected by centrifugation at 1000 rpm for 5 mins at 4°C. This was repeated twice using fresh  
65 Ca<sup>2+</sup>-chelating buffer for maximal recovery of villi enterocytes. The purity and specificity of the villi  
66 enterocyte isolation was confirmed using histological investigation (Labrie et al., 2016) and  
67 fluorescence-activated cell sorting (FACs; see below). DNA was extracted from enterocytes and  
68 the small intestinal segment lacking enterocytes using standard phenol-chloroform DNA  
69 extraction methods in combination with Phase-Lock tubes (5 Prime) after an overnight treatment  
70 in Proteinase K. DNA quantity was measured by NanoDrop ND-1000, and DNA quality was  
71 verified on a 1% agarose gel.

72

73 *Fine-mapping DNA modifications in enterocytes*

74

75 DNA modification state was examined with single nucleotide resolution in the *Lct* and  
76 *Mcm6* loci of mice using the bisulfite padlock probe technique<sup>1,3</sup>. All investigations of DNA  
77 modifications were performed on isolated villi enterocytes. Whole genome amplified DNA (WGA;  
78 Sigma), a genome devoid of DNA modifications, was also bisulfite-converted and used to verify  
79 the efficiency of the bisulfite conversion reactions; we found ~98% conversion in samples. 314  
80 padlock were targeted to unique (non-repetitive) genomic sequences (GRCm38/mm10). Probes

81 covered 90kb of the region of interest on both forward and reverse DNA strands. Target DNA  
82 regions were designed for bisulfite converted DNA using ppDesigner software. CpG sites within  
83 probes were modified to capture both modified and unmodified cytosines. Probe sequences are  
84 found in Supplementary File 1. Using a custom pipeline based on the Bismark tool<sup>4</sup>, DNA  
85 modification density was interrogated at every cytosine covered by padlock probes. Reads were  
86 first trimmed and residual adapter sequences removed using Trimmomatic-0.32. To remove phiX  
87 sequencing control DNA, reads were aligned to the phiX reference genome (NC\_001422.1) using  
88 Bismark (560 bp from the beginning of the phiX genome was appended to the end to  
89 accommodate the circular nature of the genome for read alignment). Reads that did not align to  
90 phiX were aligned to the target reference genome (GRCm38/mm10). Percent modification was  
91 estimated as the fraction of spanning reads that retained the reference “C”, and were not  
92 converted to “T” from the bisulfite treatment. Modification estimates were included only in those  
93 cytosines which received 30 or more reads. DNA modification density was interrogated at 7,580  
94 cytosines (609 CpG sites inclusive) across 148 unique samples, and additional 19 replicates.  
95 DNA modification sites were analyzed for outliers and sparsity issues (coverage in fewer than half  
96 of the samples), but none were found, and no sample-wise outliers were found by 1.5IQR limits.  
97 Biological variation exceeded technical noise; the mean deviation of DNA modifications between  
98 randomly paired samples (average standard deviation,  $0.0414 \pm 0.0114$ ) was higher than between  
99 were same sample replicates (average standard deviation,  $0.0232 \pm 0.0069$ ). All data are available  
100 from the NCBI Gene Expression Omnibus (GEO) database under accession number GSE76373.

101

### 102 *Flow cytometry analysis of isolated enterocytes*

103

104 Purity of isolated enterocytes using the chelating method was determined by flow  
105 cytometry analysis, using transgenic mice that express an mKate2 fluorophore in enterocytes  
106 only. The construct for the *Villin-mKate2* transgenic line was generated using the intestine-specific

107 mouse *Villin-1* promoter excised from the pBSKSVillinMESSV40polyA vector (gift from Dr.  
108 Louvard) and a *mKate2* gene purchased from the Evrogen. The construct was then injected into  
109 B6D2F1 hybrid mouse male pronucleus at the USC transgenic core facility. Isolated enterocyte  
110 pellets were resuspended in 5ml Accutase (STEMCELL Technologies) and incubated at 37°C for  
111 20 mins. Accutase treated cells were then centrifuged at 300xg for 5 minutes and the resulting  
112 cell pellets were resuspended in 500 µl PBS for flow sorting. Single-cell suspensions were stained  
113 with DAPI (4',6'-Diamidino-2-phenylindole) and alive enterocytes were used for subsequent  
114 sorting. Purity of enterocytes following our chelating protocol was determine by comparing the  
115 same intestinal segments from a *Villin-mKate2* mouse to those of a mouse littermate lacking  
116 *mKate2* (Supplementary Fig. 2). The Van Andel Research Institute Flow Cytometry Facility  
117 examined cells on a CytoFlex S Flow Cytometer (Beckman Coulter Inc.) and data were analyzed  
118 using FlowJo (FlowJo LLC.).

119

#### 120 *Chromatin immunoprecipitation of CTCF*

121

122 Chromatin immunoprecipitation (ChIP) was performed to investigate CTCF binding in  
123 intestinal segments 1, 3, 5, 7 and 9 of both P6 and P60 mice (n=3 per group), as well as segment  
124 7 of LAC<sup>+</sup> and lac<sup>-</sup> milk-fed mice (n=3 per group). Tissue homogenization and ChIP were  
125 performed using the MAGnify ChIP kit (Life Technologies) per the manufacturer's instructions.  
126 Immunoprecipitation was performed overnight, using 3 µl monoclonal CTCF antibody (Pierce  
127 G.758.4) per ChIP reaction, and 1 µg of mouse IgG antibody (Life Technologies) for negative  
128 control reactions. A non-immunoprecipitated input control was also prepared for each sample.  
129 qPCR was performed in triplicate on all samples for five loci: *Mcm6* exon 13/intron 13 and exon  
130 7, as well as *Lct* exon 1, intron 2 and intron 8. This was done using the SsoAdvanced Universal  
131 SYBR Green Supermix (Bio-Rad) using the Applied Biosystems ViiA 7 real-time PCR system.  
132 The reaction was carried out per the following conditions in a 20 µl total reaction volume: 0.9X

133 Universal SYBR Green Supermix, 10 µl recovered sample, 0.25 µM forward and reverse primer  
134 (primer sequences detailed in supplemental table 2); 98°C for 3 min and 50 cycles of (98°C for  
135 15 sec, 55°C for 1 min). Percent input method with background normalization was calculated for  
136 further analysis.

137

### 138 **Supplementary References**

139 1 Labrie, V. *et al.* Lactase non-persistence is directed by DNA variation-dependent  
140 epigenetic aging. *Nat Struct Mol Biol* (2016).

141 2 Weiser, M. M. Intestinal epithelial cell surface membrane glycoprotein synthesis. I. An  
142 indicator of cellular differentiation. *J Biol Chem* **248**, 2536-2541 (1973).

143 3 Diep, D. *et al.* Library-free methylation sequencing with bisulfite padlock probes. *Nat*  
144 *Methods* **9**, 270-272, doi:10.1038/nmeth.1871 (2012).

145 4 Krueger, F. & Andrews, S. R. Bismark: a flexible aligner and methylation caller for  
146 Bisulfite-Seq applications. *Bioinformatics* **27**, 1571-1572,  
147 doi:10.1093/bioinformatics/btr167 (2011).

148

149

150 **Supplementary Tables**

151  
 152 **Supplementary Table S1:** Diet-associated DNA modification between LAC+ (n=39; 7-9 per  
 153 segment) and lac- (n=35; 5-9 per segment) investigated by Pearson's and variance matrices  
 154 within each condition by modification status of individual CpGs.

| <b>Average R<sup>2</sup> (Pearson)</b> | <b>All CpGs</b> | <b>&gt;90% meth</b> | <b>90-20% meth</b> | <b>&lt;90% meth</b> | <b>&lt;20%meth</b> |
|----------------------------------------|-----------------|---------------------|--------------------|---------------------|--------------------|
| lactose-free milk vs itself            | 0.9863          | 0.8703              | 0.9497             | 0.9824              | 0.8224             |
| Normal milk vs itself                  | 0.9899          | 0.8951              | 0.9563             | 0.9871              | 0.9130             |
| lactose-free vs Normal milk            | 0.9893          | 0.8652              | 0.9595             | 0.9863              | 0.8502             |
| <i>Change in avg R<sup>2</sup></i>     | <i>0.003586</i> | <i>0.024848</i>     | <i>0.006649</i>    | <i>0.004673</i>     | <i>0.090554</i>    |
| <b>Average Variance</b>                | <b>All CpGs</b> | <b>&gt;90% meth</b> | <b>90-20% meth</b> | <b>&lt;90% meth</b> | <b>&lt;20%meth</b> |
| lactose-free milk vs itself            | 0.0705          | 0.0003              | 0.0313             | 0.0927              | 0.0016             |
| Normal milk vs itself                  | 0.0714          | 0.0004              | 0.0265             | 0.0925              | 0.0023             |
| lactose-free vs Normal milk            | 0.0705          | 0.0003              | 0.0288             | 0.0919              | 0.0019             |
| <i>Change in avg variance</i>          | <i>0.000837</i> | <i>0.000055</i>     | <i>-0.004813</i>   | <i>-0.000207</i>    | <i>0.000708</i>    |

155  
 156 **Supplementary Table S2:** CTCF ChIP-qPCR primer locations

| <b>Primer</b>                     | <b>Locus</b>               | <b>Sequence</b>       | <b>Location</b>          |
|-----------------------------------|----------------------------|-----------------------|--------------------------|
| x1-FWD                            | <i>Lct</i> exon 1          | TCTCAACAAGGTCCCAAAG   | chr1:128327796-128327815 |
| x1-REV                            | <i>Lct</i> exon 1          | TGCAGTGCTACCGACAACCTC | chr1:128327950-128327969 |
| i2-FWD                            | <i>Lct</i> intron 2        | TCCTGCACAGAAGTGAGCTG  | chr1:128313174-128313193 |
| i2-REV                            | <i>Lct</i> intron 2        | CCATAGCCAGCATACCCATC  | chr1:128313309-128313328 |
| i8-FWD                            | <i>Lct</i> intron 8        | ATCCTTTCCGTGTCATCCAG  | chr1:128299877-128299896 |
| i8-REV                            | <i>Lct</i> intron 8        | AGCCTTGATCTCCATGATGC  | chr1:128300007-128300026 |
| <i>Mcm6</i> -FWD                  | <i>Mcm6</i> intron/exon 13 | ACTCATGCATTCCCTGTTCCC | chr1:128338074-128338093 |
| <i>Mcm6</i> -REV                  | <i>Mcm6</i> intron/exon 13 | AGTACAAACGTCTCCGCCAG  | chr1:128338224-128338243 |
| <i>Mcm6</i> -X7-FWD               | <i>Mcm6</i> exon 7         | GAGGCTCGTGCAAGATTGT   | chr1:128348385-128348404 |
| <i>Mcm6</i> -X7-REV               | <i>Mcm6</i> exon 7         | CCACTTCAGTTTGGAGGGAA  | chr1:128348509-128348528 |
| Negative control A: noCTCF-up-F   |                            | GTCATAGTTCCTGGGCAA    | chr1:128490456-128490475 |
| Negative control A: noCTCF-up-R   |                            | CAACAGGATCCAGGGTCAGT  | chr1:128490568-128490587 |
| Negative control B: noCTCF-down-F |                            | CCCGAAGGAAAACAGGTGTA  | chr1:127891693-127891712 |
| Negative control B: noCTCF-down-R |                            | G TTCAGAGCAAGCCCAAGAC | chr1:127891856-127891875 |

157  
 158  
 159



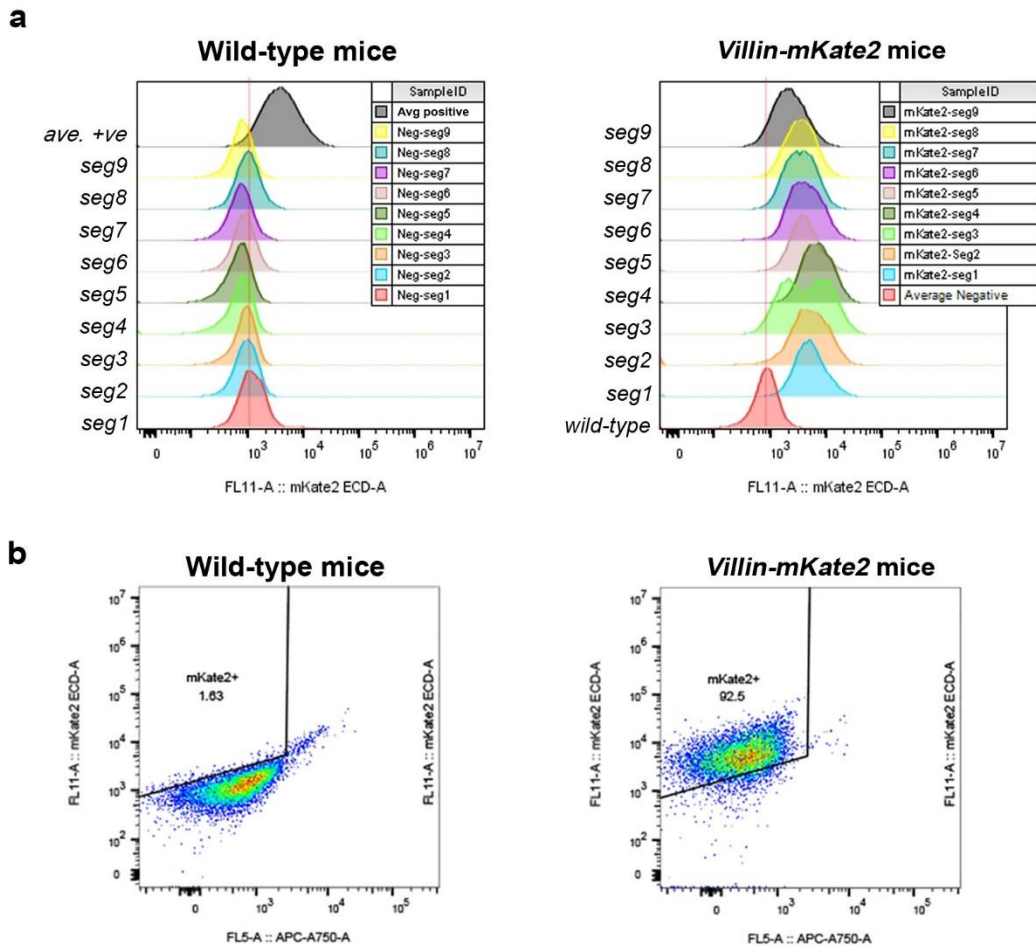

161  
 162 **Supplementary Fig. 1:** Flow cytometry analysis of purity of enterocytes that were isolated using  
 163 the chelating method. Enterocytes were isolated from *Villin-mKate2* expressing mice and wild-  
 164 type littermates by intestinal segments. **a)** Histogram depicting isolated enterocytes from wild-  
 165 type mice (left) and mice expressing mKate2 under the control of the enterocyte-specific *Villin*  
 166 promoter (right). Each of the nine intestinal segments were examined for mKate2 fluorescence  
 167 (x-axis) in wild-type and *Villin-mKate2* mice. Average positive and average negative refers to the  
 168 average mKate2 signal across all intestinal segments of *Villin-mKate2* and wild-type mice,  
 169 respectively. **b)** Representative dot plot of isolated enterocytes. Using the chelating method, we  
 170 were able to achieve ~84.8% purity in the intestinal segments. Y-axis: mKate2 fluorescence  
 171 channel.  
 172  
 173
